# Supplementary material for: Unexpectedly Streamlined Mitochondrial Genome of the Euglenozoan Euglena gracilis
Source: PubMed Central journal article supplement — Genome Biol Evol. 2015 Nov 20;7(12):3358–67. doi: 10.1093/gbe/evv229 (PMC4700960; doi:10.1093/gbe/evv229), 2015-11-20
Supplement: supp_evv229_Supplementary_Text_1-3_resubmission1.pdf [file supp_evv229_Supplementary_Text_1-3_resubmission1.pdf]

**Supplementary Text 1.** Maximum likelihood trees for mitochondrion-encoded proteins constructed with RAxML 8.0.0 with the LG+Γ model and 100 bootstrap replicates.

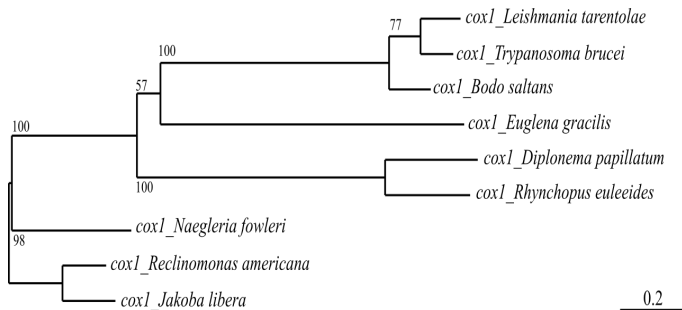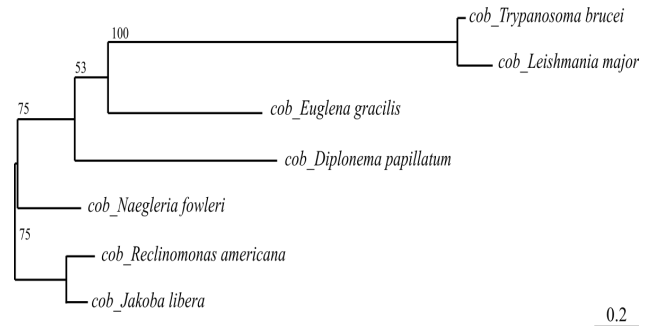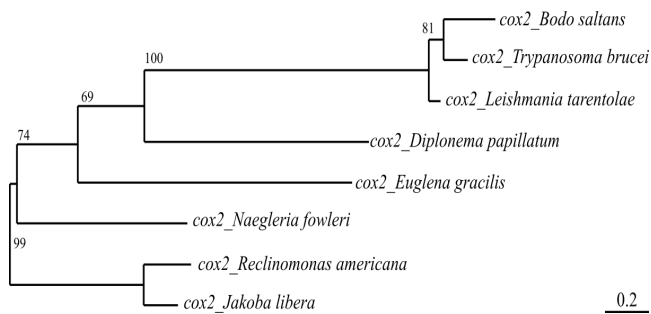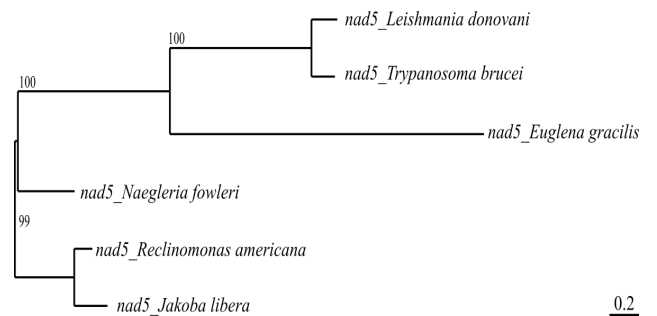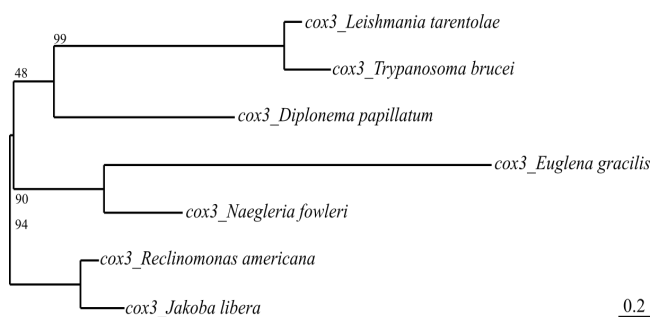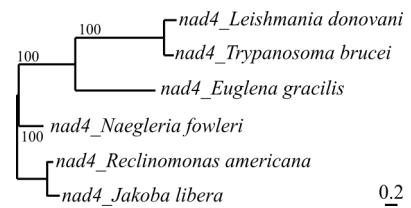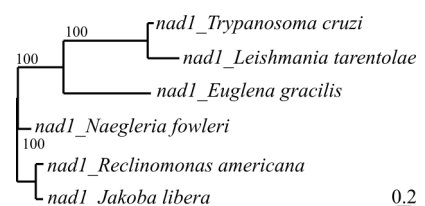

**Supplementary Text 2.** Accession numbers (NCBI GenBank database) of protein sequences used for alignments and phylogenetic analysis.

***cob* (apocytochrome b)**

|                               |                |
|-------------------------------|----------------|
| <i>Diplonema papillatum</i>   | ADP88933.1     |
| <i>Euglena gracilis</i>       | KT732262       |
| <i>Jakoba libera</i>          | AGH24175.1     |
| <i>Leishmania major</i>       | AIT97144.1     |
| <i>Naegleria fowleri</i>      | YP_007890033.1 |
| <i>Reclinomonas americana</i> | AGH24450.1     |
| <i>Trypanosoma brucei</i>     | AAA32115.1     |

***cox1* (cytochrome c oxidase subunit 1)**

|                               |                |
|-------------------------------|----------------|
| <i>Bodo saltans</i>           | AAC38978.1     |
| <i>Diplonema papillatum</i>   | ABW73865.1     |
| <i>Euglena gracilis</i>       | KT732263       |
| <i>Jakoba libera</i>          | P_007890687.1  |
| <i>Leishmania tarentolae</i>  | P14544.1       |
| <i>Naegleria fowleri</i>      | YP_007890026.1 |
| <i>Reclinomonas americana</i> | AGH24452.1     |
| <i>Rhynchopus euleeides</i>   | AEB96346.1     |
| <i>Trypanosoma brucei</i>     | P04371.1       |

***cox2* (cytochrome c oxidase subunit 2)**

|                               |                |
|-------------------------------|----------------|
| <i>Bodo saltans</i>           | AAC38976.1     |
| <i>Diplonema papillatum</i>   | ADP88934.1     |
| <i>Euglena gracilis</i>       | KT732264       |
| <i>Jakoba libera</i>          | YP_007890686.1 |
| <i>Leishmania tarentolae</i>  | P14545.2       |
| <i>Naegleria fowleri</i>      | YP_007890057.1 |
| <i>Reclinomonas americana</i> | AGH24386.1     |
| <i>Trypanosoma brucei</i>     | P04372.2       |

**cox3 (cytochrome c oxidase subunit 3)**

|                               |                |
|-------------------------------|----------------|
| <i>Diplonema papillatum</i>   | ADP88935.1     |
| <i>Euglena gracilis</i>       | KT732264       |
| <i>Jakoba libera</i>          | YP_007890722.1 |
| <i>Leishmania tarentolae</i>  | P14546.1       |
| <i>Naegleria fowleri</i>      | YP_007890030.1 |
| <i>Reclinomonas americana</i> | NP_044756.1    |
| <i>Trypanosoma brucei</i>     | AAA32122.1     |

**nad1 (NADH dehydrogenase subunit 1)**

|                               |                |
|-------------------------------|----------------|
| <i>Euglena gracilis</i>       | KT732265       |
| <i>Jakoba libera</i>          | YP_007890725.1 |
| <i>Leishmania tarentolae</i>  | P15576.1       |
| <i>Naegleria fowleri</i>      | YP_007890019.1 |
| <i>Reclinomonas americana</i> | NP_044754.1    |
| <i>Trypanosoma cruzi</i>      | AAO47331.1     |

**nad4 (NADH dehydrogenase subunit 4)**

|                               |                |
|-------------------------------|----------------|
| <i>Euglena gracilis</i>       | KT732266       |
| <i>Jakoba libera</i>          | AGH24231.1     |
| <i>Leishmania donovani</i>    | ACJ47214.1     |
| <i>Naegleria fowleri</i>      | YP_007890052.1 |
| <i>Reclinomonas americana</i> | AGH24445.1     |
| <i>Trypanosoma brucei</i>     | AAB59224.1     |

**nad5 (NADH dehydrogenase subunit 5)**

|                               |                |
|-------------------------------|----------------|
| <i>Euglena gracilis</i>       | KT732267       |
| <i>Leishmania donovani</i>    | ACJ47215.1     |
| <i>Trypanosoma brucei</i>     | AAB59225.1     |
| <i>Naegleria fowleri</i>      | YP_007890032.1 |
| <i>Reclinomonas americana</i> | NP_044800.1    |
| <i>Jakoba libera</i>          | YP_007890739.1 |

***rnsR* (small ribosomal subunit)**

*Euglena gracilis*

KT732268

### Supplementary Text 3. Protein alignments of *Euglena gracilis* mitochondrion-encoded genes.

All protein alignments were performed using MUSCLE 3.8.31 with default settings, and adjusted manually. The amino acid similarity is color-coded, with black indicating the highest similarity. Site selection for building phylogenetic trees was performed manually: selected sites are underlined in red. GenBank accession numbers of protein sequences used for alignments are available in Suppl. Text 2.

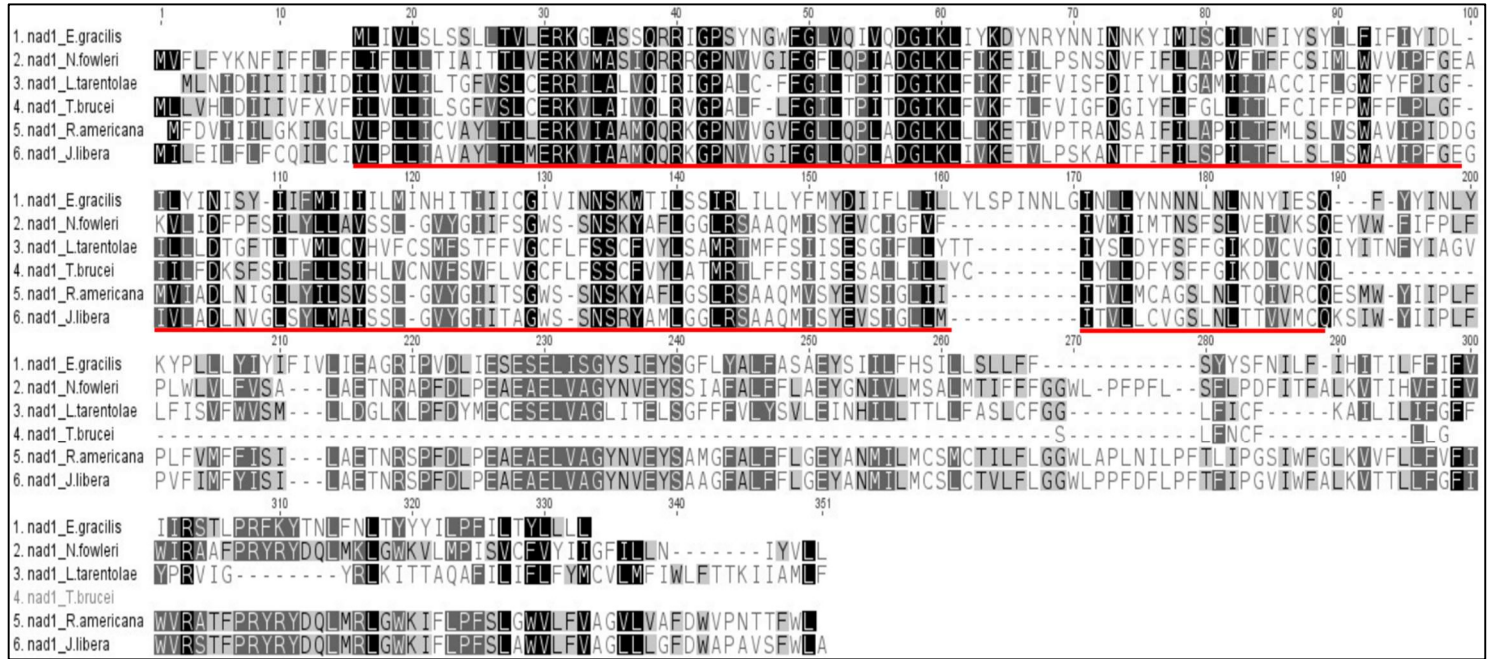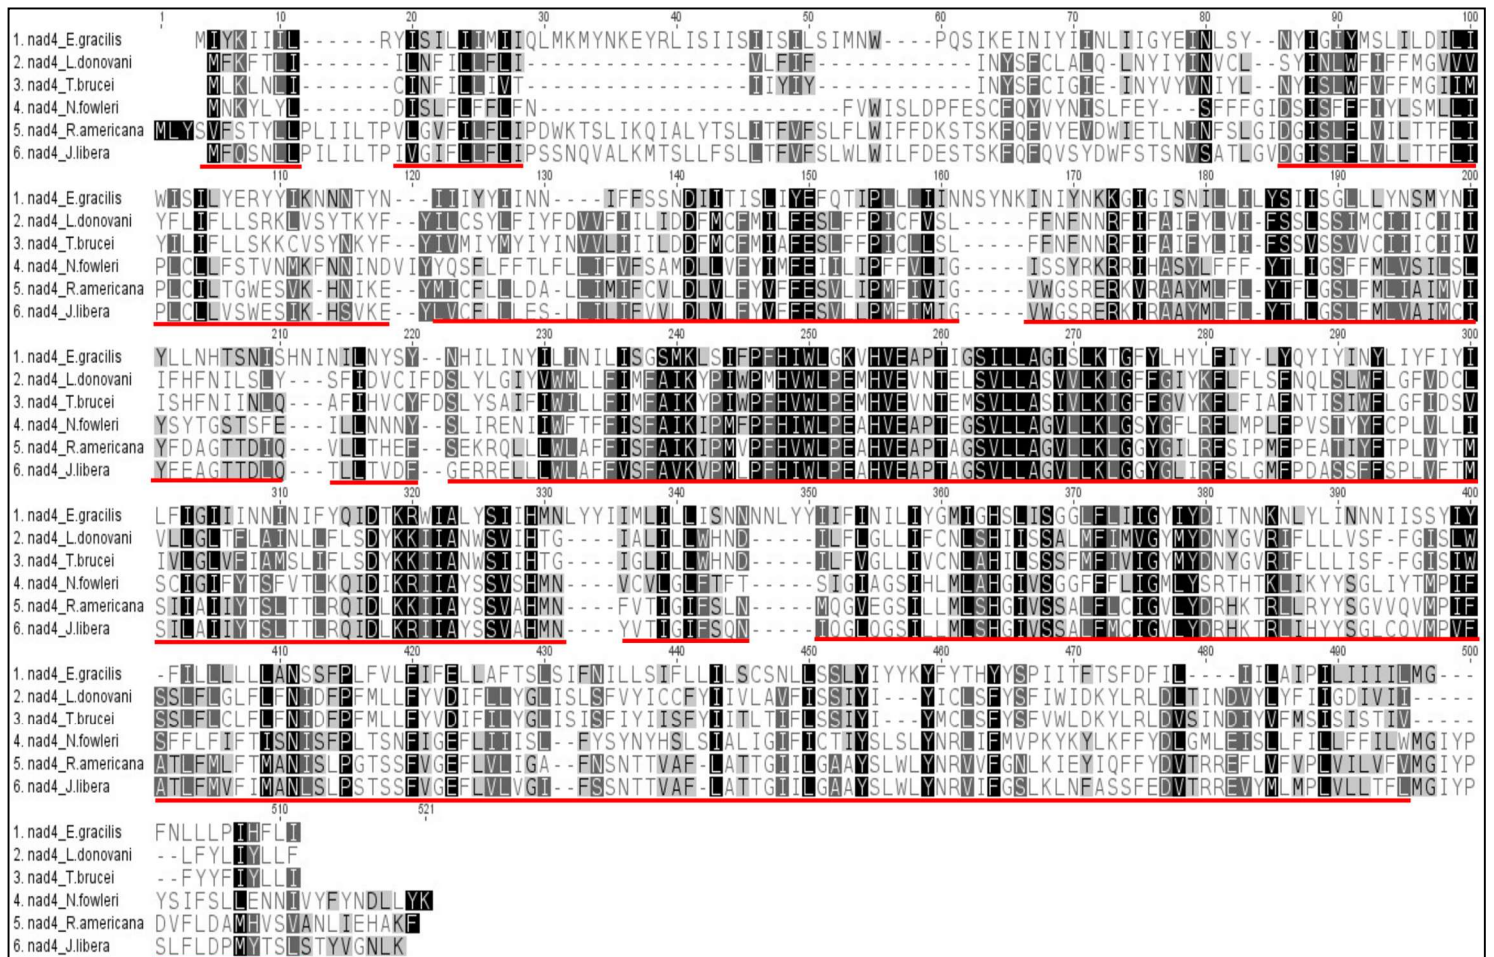



|                     |     |     |     |     |     |     |     |     |     |     |     |
|---------------------|-----|-----|-----|-----|-----|-----|-----|-----|-----|-----|-----|
| 1. nad5_E.gracilis  | 1   | 10  | 20  | 30  | 40  | 50  | 60  | 70  | 80  | 90  | 100 |
| 2. nad5_L.donovani  | 1   | 10  | 20  | 30  | 40  | 50  | 60  | 70  | 80  | 90  | 100 |
| 3. nad5_T.brucei    | 1   | 10  | 20  | 30  | 40  | 50  | 60  | 70  | 80  | 90  | 100 |
| 4. nad5_N.fowleri   | 1   | 10  | 20  | 30  | 40  | 50  | 60  | 70  | 80  | 90  | 100 |
| 5. nad5_R.americana | 1   | 10  | 20  | 30  | 40  | 50  | 60  | 70  | 80  | 90  | 100 |
| 6. nad5_J.libera    | 1   | 10  | 20  | 30  | 40  | 50  | 60  | 70  | 80  | 90  | 100 |
| 1. nad5_E.gracilis  | 110 | 120 | 130 | 140 | 150 | 160 | 170 | 180 | 190 | 200 |     |
| 2. nad5_L.donovani  | 110 | 120 | 130 | 140 | 150 | 160 | 170 | 180 | 190 | 200 |     |
| 3. nad5_T.brucei    | 110 | 120 | 130 | 140 | 150 | 160 | 170 | 180 | 190 | 200 |     |
| 4. nad5_N.fowleri   | 110 | 120 | 130 | 140 | 150 | 160 | 170 | 180 | 190 | 200 |     |
| 5. nad5_R.americana | 110 | 120 | 130 | 140 | 150 | 160 | 170 | 180 | 190 | 200 |     |
| 6. nad5_J.libera    | 110 | 120 | 130 | 140 | 150 | 160 | 170 | 180 | 190 | 200 |     |
| 1. nad5_E.gracilis  | 210 | 220 | 230 | 240 | 250 | 260 | 270 | 280 | 290 | 300 |     |
| 2. nad5_L.donovani  | 210 | 220 | 230 | 240 | 250 | 260 | 270 | 280 | 290 | 300 |     |
| 3. nad5_T.brucei    | 210 | 220 | 230 | 240 | 250 | 260 | 270 | 280 | 290 | 300 |     |
| 4. nad5_N.fowleri   | 210 | 220 | 230 | 240 | 250 | 260 | 270 | 280 | 290 | 300 |     |
| 5. nad5_R.americana | 210 | 220 | 230 | 240 | 250 | 260 | 270 | 280 | 290 | 300 |     |
| 6. nad5_J.libera    | 210 | 220 | 230 | 240 | 250 | 260 | 270 | 280 | 290 | 300 |     |
| 1. nad5_E.gracilis  | 310 | 320 | 330 | 340 | 350 | 360 | 370 | 380 | 390 | 400 |     |
| 2. nad5_L.donovani  | 310 | 320 | 330 | 340 | 350 | 360 | 370 | 380 | 390 | 400 |     |
| 3. nad5_T.brucei    | 310 | 320 | 330 | 340 | 350 | 360 | 370 | 380 | 390 | 400 |     |
| 4. nad5_N.fowleri   | 310 | 320 | 330 | 340 | 350 | 360 | 370 | 380 | 390 | 400 |     |
| 5. nad5_R.americana | 310 | 320 | 330 | 340 | 350 | 360 | 370 | 380 | 390 | 400 |     |
| 6. nad5_J.libera    | 310 | 320 | 330 | 340 | 350 | 360 | 370 | 380 | 390 | 400 |     |
| 1. nad5_E.gracilis  | 410 | 420 | 430 | 440 | 450 | 460 | 470 | 480 | 490 | 500 |     |
| 2. nad5_L.donovani  | 410 | 420 | 430 | 440 | 450 | 460 | 470 | 480 | 490 | 500 |     |
| 3. nad5_T.brucei    | 410 | 420 | 430 | 440 | 450 | 460 | 470 | 480 | 490 | 500 |     |
| 4. nad5_N.fowleri   | 410 | 420 | 430 | 440 | 450 | 460 | 470 | 480 | 490 | 500 |     |
| 5. nad5_R.americana | 410 | 420 | 430 | 440 | 450 | 460 | 470 | 480 | 490 | 500 |     |
| 6. nad5_J.libera    | 410 | 420 | 430 | 440 | 450 | 460 | 470 | 480 | 490 | 500 |     |
| 1. nad5_E.gracilis  | 510 | 520 | 530 | 540 | 550 | 560 | 570 | 580 | 590 | 600 |     |
| 2. nad5_L.donovani  | 510 | 520 | 530 | 540 | 550 | 560 | 570 | 580 | 590 | 600 |     |
| 3. nad5_T.brucei    | 510 | 520 | 530 | 540 | 550 | 560 | 570 | 580 | 590 | 600 |     |
| 4. nad5_N.fowleri   | 510 | 520 | 530 | 540 | 550 | 560 | 570 | 580 | 590 | 600 |     |
| 5. nad5_R.americana | 510 | 520 | 530 | 540 | 550 | 560 | 570 | 580 | 590 | 600 |     |
| 6. nad5_J.libera    | 510 | 520 | 530 | 540 | 550 | 560 | 570 | 580 | 590 | 600 |     |
| 1. nad5_E.gracilis  | 610 | 620 | 630 | 640 | 650 | 660 | 670 | 680 | 690 | 700 |     |
| 2. nad5_L.donovani  | 610 | 620 | 630 | 640 | 650 | 660 | 670 | 680 | 690 | 700 |     |
| 3. nad5_T.brucei    | 610 | 620 | 630 | 640 | 650 | 660 | 670 | 680 | 690 | 700 |     |
| 4. nad5_N.fowleri   | 610 | 620 | 630 | 640 | 650 | 660 | 670 | 680 | 690 | 700 |     |
| 5. nad5_R.americana | 610 | 620 | 630 | 640 | 650 | 660 | 670 | 680 | 690 | 700 |     |
| 6. nad5_J.libera    | 610 | 620 | 630 | 640 | 650 | 660 | 670 | 680 | 690 | 700 |     |
| 1. nad5_E.gracilis  | 710 | 720 | 730 | 740 | 750 | 760 | 762 |     |     |     |     |
| 2. nad5_L.donovani  | 710 | 720 | 730 | 740 | 750 | 760 | 762 |     |     |     |     |
| 3. nad5_T.brucei    | 710 | 720 | 730 | 740 | 750 | 760 | 762 |     |     |     |     |
| 4. nad5_N.fowleri   | 710 | 720 | 730 | 740 | 750 | 760 | 762 |     |     |     |     |
| 5. nad5_R.americana | 710 | 720 | 730 | 740 | 750 | 760 | 762 |     |     |     |     |
| 6. nad5_J.libera    | 710 | 720 | 730 | 740 | 750 | 760 | 762 |     |     |     |     |





1. cox1\_E.gracilis MNNIMHMTIKYTLTTSKTIIGLIGYMGYIAGLIGYHSMTRMELNTQGLAVRKKVKEVTIYNWITITLGLMLFVFTIPVIGIFYGNYLIPMLTGTSELSPMRNIGSFNMLIVGVVIFININVMISKI  
2. cox1\_D.papillatum MHLLEAASVWVITNKLIGVYISWSIAFGVSGLMSMTRAEGLSEQVLFSDHQL--YVNVITITLGLMLFVFTIPVIGIFYGNYLIPMLTGTSELSPMRNIGSFNMLIVGVVIFININVMISKI  
3. cox1\_R.euleioides MPTISVTPATAWITNKLIGVYISWSIAFGVSGLMSMTRAEGLSEQVLFSDHQL--YVNVITITLGLMLFVFTIPVIGIFYGNYLIPMLTGTSELSPMRNIGSFNMLIVGVVIFININVMISKI  
4. cox1\_B.saltans MYFLSLLCLTISKIMGYSYILAIMCGFVGVYISLFRLELLELLCGVLFSDYOF--YVNVITITLGLMLFVFTIPVIGIFYGNYLIPMLTGTSELSPMRNIGSFNMLIVGVVIFININVMISKI  
5. cox1\_L.tarentolae MFMQLVCLISKIMGICYLVAILSGFVGVYISLFRLELLELLCGVLFSDYOF--YVNVITITLGLMLFVFTIPVIGIFYGNYLIPMLTGTSELSPMRNIGSFNMLIVGVVIFININVMISKI  
6. cox1\_T.brucei MFFLCLVCLISKIMGICYLVAILSGFVGVYISLFRLELLELLCGVLFSDYOF--YVNVITITLGLMLFVFTIPVIGIFYGNYLIPMLTGTSELSPMRNIGSFNMLIVGVVIFININVMISKI  
7. cox1\_N.fowleri MYDFLIRWVLYITNKLIGLIGYMGYIAGLIGYHSMTRMELNTQGLAVRKKVKEVTIYNWITITLGLMLFVFTIPVIGIFYGNYLIPMLTGTSELSPMRNIGSFNMLIVGVVIFININVMISKI  
8. cox1\_J.libera MTLGTRWVLYITNKLIGLIGYMGYIAGLIGYHSMTRMELNTQGLAVRKKVKEVTIYNWITITLGLMLFVFTIPVIGIFYGNYLIPMLTGTSELSPMRNIGSFNMLIVGVVIFININVMISKI  
9. cox1\_R.americana MVTSEVRRWFFSTNHLKIGLIGYMGYIAGLIGYHSMTRMELNTQGLAVRKKVKEVTIYNWITITLGLMLFVFTIPVIGIFYGNYLIPMLTGTSELSPMRNIGSFNMLIVGVVIFININVMISKI

140 150 160 170 180 190 200 210 220 230 240 250 260

1. cox1\_E.gracilis PISSGWTLVYPLSTRDADNIGVNDLQLVHVLGISSTIGSNVYITIKYNRHVGLTFMNIYVNESITVTSITLIGSLPTIGVAITGILLDRINISITIDYVI--SDPVLVYQHLWFEGHPEVYVITLPIV  
2. cox1\_D.papillatum GAGTAVTVYPLSMTASIG-GVSDVDFITVSLHAAQLSSTIGATNIVICCYARRTHSCVQLQSSLYPMSVAITGALLVIGITIPVWAGATITMLLDRITGITVYDVAAGGDVVMYEHLEWEGHPEVYVITLPIV  
3. cox1\_R.euleioides GAGTAVTVYPLSMTASIG-GTSMVDFITVSLHAAQLSSTIGATNIVICCYARRTHSCVQLQSSLYPMSVAITGALLVIGITIPVWAGATITMLLDRGCTSYDYDVAAGGDVVMYEHLEWEGHPEVYVITLPIV  
4. cox1\_B.saltans GAGTAVTVYPLSMTASIG-GTSMVDFITVSLHAAQLSSTIGATNIVICCYARRTHSCVQLQSSLYPMSVAITGALLVIGITIPVWAGATITMLLDRGCTSYDYDVAAGGDVVMYEHLEWEGHPEVYVITLPIV  
5. cox1\_L.tarentolae GAGTAVTVYPLSMTASIG-GTSMVDFITVSLHAAQLSSTIGATNIVICCYARRTHSCVQLQSSLYPMSVAITGALLVIGITIPVWAGATITMLLDRGCTSYDYDVAAGGDVVMYEHLEWEGHPEVYVITLPIV  
6. cox1\_T.brucei GAGTAVTVYPLSMTASIG-GTSMVDFITVSLHAAQLSSTIGATNIVICCYARRTHSCVQLQSSLYPMSVAITGALLVIGITIPVWAGATITMLLDRGCTSYDYDVAAGGDVVMYEHLEWEGHPEVYVITLPIV  
7. cox1\_N.fowleri GAGTAVTVYPLSMTASIG-GTSMVDFITVSLHAAQLSSTIGATNIVICCYARRTHSCVQLQSSLYPMSVAITGALLVIGITIPVWAGATITMLLDRGCTSYDYDVAAGGDVVMYEHLEWEGHPEVYVITLPIV  
8. cox1\_J.libera GAGTAVTVYPLSMTASIG-GTSMVDFITVSLHAAQLSSTIGATNIVICCYARRTHSCVQLQSSLYPMSVAITGALLVIGITIPVWAGATITMLLDRGCTSYDYDVAAGGDVVMYEHLEWEGHPEVYVITLPIV  
9. cox1\_R.americana GAGTAVTVYPLSMTASIG-GTSMVDFITVSLHAAQLSSTIGATNIVICCYARRTHSCVQLQSSLYPMSVAITGALLVIGITIPVWAGATITMLLDRGCTSYDYDVAAGGDVVMYEHLEWEGHPEVYVITLPIV

270 280 290 300 310 320 330 340 350 360 370 380 390

1. cox1\_E.gracilis FGLVSLITLTSIHKDIFREGMMYITLISGIVGVYVAHMHMTGLDIDSRSYESTATISITIPISIKKVESYINWAGGRGFRGNNSWSVFFSFLICFCGGFGLSSGSLDMLHDTIYVWVHEHIVL  
2. cox1\_D.papillatum FGLVSLIRGGFLSIVYMGVYVANIHAIVGVYVAHMHMTGLDIDSRSYESTATISITIPISIKKVESYINWAGGRGFRGNNSWSVFFSFLICFCGGFGLSSGSLDMLHDTIYVWVHEHIVL  
3. cox1\_R.euleioides FGLVSHIIRTAVFVSIVYMGVYVANIHAIVGVYVAHMHMTGLDIDSRSYESTATISITIPISIKKVESYINWAGGRGFRGNNSWSVFFSFLICFCGGFGLSSGSLDMLHDTIYVWVHEHIVL  
4. cox1\_B.saltans FGLVSLITLTIIGLRCVSTWAMVYSLNLSLGLGFFVAHMHMTGLDIDSRSYESTATISITIPISIKKVESYINWAGGRGFRGNNSWSVFFSFLICFCGGFGLSSGSLDMLHDTIYVWVHEHIVL  
5. cox1\_L.tarentolae FGLVSTLIVIEVIGRCVSTWAMVYSLNLSLGLGFFVAHMHMTGLDIDSRSYESTATISITIPISIKKVESYINWAGGRGFRGNNSWSVFFSFLICFCGGFGLSSGSLDMLHDTIYVWVHEHIVL  
6. cox1\_T.brucei FGLVSTLIEVTSFRCVSSTWAMVYSLNLSLGLGFFVAHMHMTGLDIDSRSYESTATISITIPISIKKVESYINWAGGRGFRGNNSWSVFFSFLICFCGGFGLSSGSLDMLHDTIYVWVHEHIVL  
7. cox1\_N.fowleri FGLVSHIIRTAVFVSIVYMGVYVANIHAIVGVYVAHMHMTGLDIDSRSYESTATISITIPISIKKVESYINWAGGRGFRGNNSWSVFFSFLICFCGGFGLSSGSLDMLHDTIYVWVHEHIVL  
8. cox1\_J.libera FGLVSHIIRTAVFVSIVYMGVYVANIHAIVGVYVAHMHMTGLDIDSRSYESTATISITIPISIKKVESYINWAGGRGFRGNNSWSVFFSFLICFCGGFGLSSGSLDMLHDTIYVWVHEHIVL  
9. cox1\_R.americana FGLVSHIIRTAVFVSIVYMGVYVANIHAIVGVYVAHMHMTGLDIDSRSYESTATISITIPISIKKVESYINWAGGRGFRGNNSWSVFFSFLICFCGGFGLSSGSLDMLHDTIYVWVHEHIVL

400 410 420 430 440 450 460 470 480 490 500 510 520

1. cox1\_E.gracilis SLAATFGLLIAHYFLPIIFSYSIFESFSFYHTLVLGALLVYPMHAGLSMARRVPEYADIFPEMTVGFHGTFLIF-----STLTF-IRSYFQLSHINHSNYL  
2. cox1\_D.papillatum SLGAVFGLLNGVLSCHELCSGYRASAALLRQVVLVWGTCTIFWGMHSGTLGLSRVVDADQYIGTVVSTTCGLVWLVWALLCASLEASLWDTQQL--RATRSTNPGMHNHMLSGM-----  
3. cox1\_R.euleioides SLGAVYGMLTGLSVHLLGGDIGAMHARMLGIMLIGTATLWMSLSSGSLGPRRMPDPTDYMQYVPTVGIYVWLVWALLHGGIGAMESVLESTHA-RNTISYVSTSGMHSSTTLPNSDARST  
4. cox1\_B.saltans SLGAVIGFRCGFLHFCVRLPILFYFLMYYFLWTLWLGSLNLLPRLSLGAYAFPRRISDYDISLFWSVLLCGMLFVCLLFAACLFVSLMFDYCIFFVSIYICLFCFYSFNSWLPFVMLYLLL  
5. cox1\_L.tarentolae SLGAVIGFRTGFIHFLAKWLPILFYFLMYYFLWTLWLGSLNLLPRLSLGAYAFPRRISDYDISLFWSVLLCGMLFVCLLFAACLFVSLMFDYCIFFVSLFVSLYCFYFSTWPCVMVLYLLL  
6. cox1\_T.brucei SLGAVIGVFGGFFHLMKWLPIELHTFWLFFFISTLWFGSNMVEPRLSLGAYAFPRRISDYDISLFWSAFTLGMMLLFFLWIFCCCLFVNLFWDYCLFFINLFTYSIFFYFVWVPCMAIYLLV  
7. cox1\_N.fowleri SMGAVAIYGGYFYMWGMKTLGSYSELGQAHFMTFIFNFTFPMHGLSAGMPRRIPDYDPAFAGWNLISTVGSYSSISULL-----WFYIVY--RTLTDGKCSNNPWANDTSTNQTNYF  
8. cox1\_J.libera SMGAVAFSMAAAYYWGKMTGYQYPETLAKIQFWTTFIFNLTFFPMHGLSAGMPRRIPDYDPAFAGWNLISTVGSYSSISULL-----WFYIVY--RTLTDGKCSNNPWANDTSTNQTNYF  
9. cox1\_R.americana SMGAVAFIYAAAYYWGKMTGYQYPETLAKIQFWTTFIFNLTFFPMHGLSAGMPRRIPDYDPAFAGWNLISTVGSYSSISULL-----WFYIVY--RTLTDGKCSNNPWANDTSTNQTNYF

530 540 550 560 570 580 590 600 610 620 630 640 654

1. cox1\_E.gracilis -----SLLHATRQQLMHTCVSTSHRASHMLEE  
2. cox1\_D.papillatum -----AII-----VLSMVAHNGVCSATLY  
3. cox1\_R.euleioides -----VDFAIH-----VLDYLF-----IITISFCFIYVFFSFSVLLLL  
4. cox1\_B.saltans -----VDFAIH-----VLDYLF-----IITISFCFIYVFFSFSVLLLL  
5. cox1\_L.tarentolae -----VDFAIH-----VLDYLF-----IITISFCFIYVFFSFSVLLLL  
6. cox1\_T.brucei -----VDFAIH-----VLDYLF-----IITISFCFIYVFFSFSVLLLL  
7. cox1\_N.fowleri GVIYVYKYGVSGRSVNIKMSDFIEKWIISFNYYTNRVYISSESIKTTLWTLTSPPYCHTEVVPKDFTTGKHVYRWRVAIWNKRRKLLPLYLKGTETFNHFYITTYTYINPLVSNWIKTEGSSSFS  
8. cox1\_J.libera TLEWTLSSPPQVHTFEEVPPYRETITKH  
9. cox1\_R.americana TLEWTLSSPPLSHTEFVPPYKETTK

1. cox2\_E.gracilis MRYGNREIESLILFFDQTHIYTSIINALVIGITL--IIRKWNKRGKICN-----  
2. cox2\_D.papillatum MVLHGLAVNYTTHVALL--VNLVAIVVFAAGAMHSATVSRN-----  
3. cox2\_B.saltans MSAFISFWMLFIDSLVLL--SGAIFVCIWICSLFFCLIFKLDYIFCSW-----  
4. cox2\_L.tarentolae MSAFISFWMLFIDSLVLL--SFCVFCVWICACMLFSTVLLVSKLNNIYCTW-----  
5. cox2\_T.brucei MSAFISFWMLFIDSLVLL--SFSIFLSVWICACMLIATVLTVTKINNIYCTW-----  
6. cox2\_N.fowleri METKRAFLFSNINVELTRYFGGMPANDKMSLVLQYIETWVSL--IAVAFVVGFI--VLSWITKFNNSVNPVAYHF  
7. cox2\_R.americana MLLQVTVFTLIVLVYVSGTITPAFADYAEKWLDFEQDPAVPMVEGIIINHHDLWFFL--ILIAVFLVLI--LRLTYLFFDRSKNTPMS  
8. cox2\_J.libera MLQKLFLLTISFACTLGLACADAPEQWQDFQDAASPIIMEGIVDHHDLWFFL--VVIVVFTWL--LARVVIQFRSSVNPVPS

110 120 130 140 150 160 170 180 190 200

1. cox2\_E.gracilis ---QYIYHIKTEVITLPIIFLIVIVLHVSIVYVNL--EINKGTTNKYINVIIGNQWYVIYNN-----IES  
2. cox2\_D.papillatum ---LYTSNLYLELVVLLTPRTAMVIVLVRVVMVQCSE--EELQ-LHGTQWVHVANQWYVYV--DA-----VSLFLYAVQ  
3. cox2\_B.saltans ---DFISAKFIDLYWFTLGCDFVLCILRLCLLYFS--CLNF-VCFDLCKCTIGQWYVYVFI--FGE--TTIFSNTLLE  
4. cox2\_L.tarentolae ---DFTASKFIDYWFITGGMFLGILRLCLLYFG--HLNF-VSFDLCKVIGQWYVYVFI--FGE--TTIFSNTLLE  
5. cox2\_T.brucei ---DFISSKFIDYWFVFLGMMFLLCLRLCLLYFS--CINF-VSFDLCKVIGQWYVYVFI--FGE--TTIFSNTLLE  
6. cox2\_N.fowleri ---SKKVEAFLDITVALLPVLISYLLPALGFTLQLEYDENFLETFNWYIIGHQWYVYVFI--FGE--TTIFSNTLLE  
7. cox2\_R.americana ---KVVHGTVLEIITTIAPSFILLAITPSPFALLYSM--EEST-DPAITLKAIGHQWYVYVFI--SDYTTD-SES-----LAFDSYMWPE  
8. cox2\_J.libera ---TTHGTTIEITTIIPAVLITLITPTFAALLYSM--DEGI-DPAITLKAIGHQWYVYVFI--SDYTS-DES-----LAFESYMWPE

210 220 230 240 250 260 270 280 290 300

1. cox2\_E.gracilis RISSLG--RITLVDQPLFIKANNNTHTISSLQVTHSFAIPTLGIKVDATPGRININISINGLTQGLYVGYCSELGGSGHAFMPINLIVY  
2. cox2\_D.papillatum HDMHHGDLRLLCGMQSLIDSSCVLQALTSDDVTHAWALPSLGMKVDQVPRGRANTATLVSVTGTLYGOCSEVCGALHGMYPLCMTV  
3. cox2\_B.saltans SDYLIQDLRLLCQNHVLTLSLVYIKWLSAIVDTHSFAISLGIKVDCTIPGRCNELIFSNSSITVYOCSELGGVHGMPITVSCFI  
4. cox2\_L.tarentolae SDYMIQDLRLLCQNHVLTLSLVYIKWLSAIVDTHSFAISLGIKVDCTIPGRCNELIFSNSSATVYOCSELGGVHGMPITVSCFI  
5. cox2\_T.brucei SDYLIQDLRLLCQNHVLTLSLVYIKWLSAIVDTHSFAISLGIKVDCTIPGRCNELIFSNSSATVYOCSELGGVHGMPITVSCFI  
6. cox2\_N.fowleri SKKN--RLNVDKCLVPPNGNHICFYVLSAIVDTHAWAVPQLGKVDALPGRRLMRFVLYSSIEGVYOCSELGGVHGMPITVSCFI  
7. cox2\_R.americana ADLQPGQLRLLEVDNRVIVPVDTHYRMLVTSQDVLHSAWALPSLGIKVDAPGRLLNQVSMFKREGVYVYOCSEICGVNHFMPITVSCFI  
8. cox2\_J.libera EDLQPGQLRLLEVDNRVIVPVDTHYRMLVTSQDVLHSAWALPSLGIKVDAPGRLLNQVSMFKREGVYVYOCSEICGVNHFMPITVSCFI

310 320 325

1. cox2\_E.gracilis  
2. cox2\_D.papillatum  
3. cox2\_B.saltans  
4. cox2\_L.tarentolae  
5. cox2\_T.brucei  
6. cox2\_N.fowleri SLDVHLVSRNLLSSISINDSSSIFIK  
7. cox2\_R.americana QTEM  
8. cox2\_J.libera ELET



|                      |  |     |     |     |     |     |     |     |     |     |     |     |   |   |   |   |   |   |     |     |   |   |     |   |   |   |   |   |   |   |   |   |   |   |   |   |   |   |   |   |   |   |   |   |   |   |   |   |   |   |   |   |   |   |   |   |   |   |   |   |     |   |   |   |     |   |   |   |   |   |   |   |   |   |   |   |   |   |   |   |   |   |   |   |   |   |   |   |   |   |
|----------------------|--|-----|-----|-----|-----|-----|-----|-----|-----|-----|-----|-----|---|---|---|---|---|---|-----|-----|---|---|-----|---|---|---|---|---|---|---|---|---|---|---|---|---|---|---|---|---|---|---|---|---|---|---|---|---|---|---|---|---|---|---|---|---|---|---|---|---|-----|---|---|---|-----|---|---|---|---|---|---|---|---|---|---|---|---|---|---|---|---|---|---|---|---|---|---|---|---|---|
|                      |  | 10  | 20  | 30  | 40  | 50  | 60  | 70  | 80  | 90  | 100 |     |   |   |   |   |   |   |     |     |   |   |     |   |   |   |   |   |   |   |   |   |   |   |   |   |   |   |   |   |   |   |   |   |   |   |   |   |   |   |   |   |   |   |   |   |   |   |   |   |     |   |   |   |     |   |   |   |   |   |   |   |   |   |   |   |   |   |   |   |   |   |   |   |   |   |   |   |   |   |
| 1. cox3_E.gracilis   |  | W   | I   | L   | N   | T   | N   | I   | Y   | G   | G   | R   | N | S | R | L | C | Y | L   | I   | P | L | --- |   |   |   |   |   |   |   |   |   |   |   |   |   |   |   |   |   |   |   |   |   |   |   |   |   |   |   |   |   |   |   |   |   |   |   |   |   |     |   |   |   |     |   |   |   |   |   |   |   |   |   |   |   |   |   |   |   |   |   |   |   |   |   |   |   |   |   |
| 2. cox3_D.papillatum |  | W   | Y   | H   | T   | L   | R   | S   | T   | V   | Q   | --- |   |   |   |   |   |   |     |     |   |   |     |   |   |   |   |   |   |   |   |   |   |   |   |   |   |   |   |   |   |   |   |   |   |   |   |   |   |   |   |   |   |   |   |   |   |   |   |   |     |   |   |   |     |   |   |   |   |   |   |   |   |   |   |   |   |   |   |   |   |   |   |   |   |   |   |   |   |   |
| 3. cox3_L.tarentolae |  | K   | R   | R   | G   | F   | D   | --- |     |     |     |     |   |   |   |   |   |   |     |     |   |   |     |   |   |   |   |   |   |   |   |   |   |   |   |   |   |   |   |   |   |   |   |   |   |   |   |   |   |   |   |   |   |   |   |   |   |   |   |   |     |   |   |   |     |   |   |   |   |   |   |   |   |   |   |   |   |   |   |   |   |   |   |   |   |   |   |   |   |   |
| 4. cox3_T.brucei     |  | M   | F   | L   | F   | R   | C   | I   | F   | V   | G   | V   | S | - |   |   |   |   |     |     |   |   |     |   |   |   |   |   |   |   |   |   |   |   |   |   |   |   |   |   |   |   |   |   |   |   |   |   |   |   |   |   |   |   |   |   |   |   |   |   |     |   |   |   |     |   |   |   |   |   |   |   |   |   |   |   |   |   |   |   |   |   |   |   |   |   |   |   |   |   |
| 5. cox3_N.fowleri    |  | I   | L   | N   | Y   | W   | E   | K   | Y   | K   | Y   | D   | V | R | T | S | S | R | R   | L   | H | Y | F   | N | D | I | T | Y | T | P | W | P | F | H | I | S | M | I | V | F | L | S | L | F | F | C | V | Y | L | H | H | F | A | W | A | G | K | A | L | T | F   | F | I | W | --- |   |   |   |   |   |   |   |   |   |   |   |   |   |   |   |   |   |   |   |   |   |   |   |   |   |
| 6. cox3_R.americana  |  | M   | S   | Q   | T   | F   | V   | K   | --- |     |     |     |   |   |   |   |   |   |     |     |   |   |     |   |   |   |   |   |   |   |   |   |   |   |   |   |   |   |   |   |   |   |   |   |   |   |   |   |   |   |   |   |   |   |   |   |   |   |   |   |     |   |   |   |     |   |   |   |   |   |   |   |   |   |   |   |   |   |   |   |   |   |   |   |   |   |   |   |   |   |
| 7. cox3_J.libera     |  | W   | S   | S   | L   | S   | L   | K   | --- |     |     |     |   |   |   |   |   |   |     |     |   |   |     |   |   |   |   |   |   |   |   |   |   |   |   |   |   |   |   |   |   |   |   |   |   |   |   |   |   |   |   |   |   |   |   |   |   |   |   |   |     |   |   |   |     |   |   |   |   |   |   |   |   |   |   |   |   |   |   |   |   |   |   |   |   |   |   |   |   |   |
|                      |  | 110 | 120 | 130 | 140 | 150 | 160 | 170 | 180 | 190 | 200 |     |   |   |   |   |   |   |     |     |   |   |     |   |   |   |   |   |   |   |   |   |   |   |   |   |   |   |   |   |   |   |   |   |   |   |   |   |   |   |   |   |   |   |   |   |   |   |   |   |     |   |   |   |     |   |   |   |   |   |   |   |   |   |   |   |   |   |   |   |   |   |   |   |   |   |   |   |   |   |
| 1. cox3_E.gracilis   |  | L   | Y   | N   | I   | A   | T   | F   | I   | F   | L   | L   | I | L | I | G | F | Y | N   | L   | Y | I | --- |   |   |   |   |   |   |   |   |   |   |   |   |   |   |   |   |   |   |   |   |   |   |   |   |   |   |   |   |   |   |   |   |   |   |   |   |   |     |   |   |   |     |   |   |   |   |   |   |   |   |   |   |   |   |   |   |   |   |   |   |   |   |   |   |   |   |   |
| 2. cox3_D.papillatum |  | L   | A   | G   | V   | L   | L   | W   | L   | S   | E   | V   | A | L | F | V | S | V | I   | W   | A | L | V   | - |   |   |   |   |   |   |   |   |   |   |   |   |   |   |   |   |   |   |   |   |   |   |   |   |   |   |   |   |   |   |   |   |   |   |   |   |     |   |   |   |     |   |   |   |   |   |   |   |   |   |   |   |   |   |   |   |   |   |   |   |   |   |   |   |   |   |
| 3. cox3_L.tarentolae |  | I   | Q   | C   | F   | V   | W   | F   | I   | S   | E   | L   | L | F | L | S | L | F | V   | V   | F | S | L   | V | L | F | V | S | V | E | F | A | F | V | F | I | P | M | F | S | C | L | I | C | D | F | G | F | V | Y | Y | I | D | I | F | N | L | I | N | T | F   | L | F | V | S   | G | L | F | V | N | F | V | L | F | L | F | W | F | R | F | F | L | C | V | L | F | M | W | W | V |
| 4. cox3_T.brucei     |  | I   | Q   | C   | F   | V   | W   | F   | I   | S   | E   | L   | L | F | L | S | L | F | V   | V   | F | S | L   | V | L | F | V | S | V | E | F | A | F | V | F | I | P | M | F | S | C | L | I | C | D | F | G | F | V | Y | Y | I | D | I | F | N | L | I | N | T | F   | L | F | V | S   | G | L | F | V | N | F | V | L | F | L | F | W | F | R | F | F | L | C | V | L | F | M | W | W | V |
| 5. cox3_N.fowleri    |  | M   | V   | G   | F   | L   | L   | I   | S   | E   | A   | A   | V | F | A | S | F | I | M   | A   | Y | F | --- |   |   |   |   |   |   |   |   |   |   |   |   |   |   |   |   |   |   |   |   |   |   |   |   |   |   |   |   |   |   |   |   |   |   |   |   |   |     |   |   |   |     |   |   |   |   |   |   |   |   |   |   |   |   |   |   |   |   |   |   |   |   |   |   |   |   |   |
| 6. cox3_R.americana  |  | R   | I   | G   | M   | L   | F   | I   | S   | E   | V   | M   | F | V | S | F | F | A | F   | --- |   |   |     |   |   |   |   |   |   |   |   |   |   |   |   |   |   |   |   |   |   |   |   |   |   |   |   |   |   |   |   |   |   |   |   |   |   |   |   |   |     |   |   |   |     |   |   |   |   |   |   |   |   |   |   |   |   |   |   |   |   |   |   |   |   |   |   |   |   |   |
| 7. cox3_J.libera     |  | K   | L   | G   | M   | L   | F   | I   | S   | E   | V   | M   | F | V | S | F | F | A | F   | --- |   |   |     |   |   |   |   |   |   |   |   |   |   |   |   |   |   |   |   |   |   |   |   |   |   |   |   |   |   |   |   |   |   |   |   |   |   |   |   |   |     |   |   |   |     |   |   |   |   |   |   |   |   |   |   |   |   |   |   |   |   |   |   |   |   |   |   |   |   |   |
|                      |  | 210 | 220 | 230 | 240 | 250 | 260 | 270 | 280 | 290 | 300 |     |   |   |   |   |   |   |     |     |   |   |     |   |   |   |   |   |   |   |   |   |   |   |   |   |   |   |   |   |   |   |   |   |   |   |   |   |   |   |   |   |   |   |   |   |   |   |   |   |     |   |   |   |     |   |   |   |   |   |   |   |   |   |   |   |   |   |   |   |   |   |   |   |   |   |   |   |   |   |
| 1. cox3_E.gracilis   |  | H   | N   | L   | L   | --- |     |     |     |     |     |     |   |   |   |   |   |   |     |     |   |   |     |   |   |   |   |   |   |   |   |   |   |   |   |   |   |   |   |   |   |   |   |   |   |   |   |   |   |   |   |   |   |   |   |   |   |   |   |   |     |   |   |   |     |   |   |   |   |   |   |   |   |   |   |   |   |   |   |   |   |   |   |   |   |   |   |   |   |   |
| 2. cox3_D.papillatum |  | V   | W   | C   | L   | G   | G   | C   | F   | -   |     |     |   |   |   |   |   |   |     |     |   |   |     |   |   |   |   |   |   |   |   |   |   |   |   |   |   |   |   |   |   |   |   |   |   |   |   |   |   |   |   |   |   |   |   |   |   |   |   |   |     |   |   |   |     |   |   |   |   |   |   |   |   |   |   |   |   |   |   |   |   |   |   |   |   |   |   |   |   |   |
| 3. cox3_L.tarentolae |  | G   | L   | F   | G   | F   | L   | -   |     |     |     |     |   |   |   |   |   |   |     |     |   |   |     |   |   |   |   |   |   |   |   |   |   |   |   |   |   |   |   |   |   |   |   |   |   |   |   |   |   |   |   |   |   |   |   |   |   |   |   |   |     |   |   |   |     |   |   |   |   |   |   |   |   |   |   |   |   |   |   |   |   |   |   |   |   |   |   |   |   |   |
| 4. cox3_T.brucei     |  | S   | L   | F   | G   | F   | L   | -   |     |     |     |     |   |   |   |   |   |   |     |     |   |   |     |   |   |   |   |   |   |   |   |   |   |   |   |   |   |   |   |   |   |   |   |   |   |   |   |   |   |   |   |   |   |   |   |   |   |   |   |   |     |   |   |   |     |   |   |   |   |   |   |   |   |   |   |   |   |   |   |   |   |   |   |   |   |   |   |   |   |   |
| 5. cox3_N.fowleri    |  | G   | T   | A   | L   | G   | V   | I   | V   | L   | F   | I   | Q | L | S | E | Y | V | S   | T   | N | T | L   | S | I | S | D | S | M | V | G | S | C | Y | L | I | T | G | F | H | L | F | V | C | T | G | L | I | F | S | L | A | T | A | Q | L | D | N | Y | S | --- |   |   |   |     |   |   |   |   |   |   |   |   |   |   |   |   |   |   |   |   |   |   |   |   |   |   |   |   |   |
| 6. cox3_R.americana  |  | T   | I   | L   | A   | V   | T   | E   | -   |     |     |     |   |   |   |   |   |   |     |     |   |   |     |   |   |   |   |   |   |   |   |   |   |   |   |   |   |   |   |   |   |   |   |   |   |   |   |   |   |   |   |   |   |   |   |   |   |   |   |   |     |   |   |   |     |   |   |   |   |   |   |   |   |   |   |   |   |   |   |   |   |   |   |   |   |   |   |   |   |   |
| 7. cox3_J.libera     |  | T   | V   | L   | A   | S   | A   | F   | -   |     |     |     |   |   |   |   |   |   |     |     |   |   |     |   |   |   |   |   |   |   |   |   |   |   |   |   |   |   |   |   |   |   |   |   |   |   |   |   |   |   |   |   |   |   |   |   |   |   |   |   |     |   |   |   |     |   |   |   |   |   |   |   |   |   |   |   |   |   |   |   |   |   |   |   |   |   |   |   |   |   |
|                      |  | 310 | 318 |     |     |     |     |     |     |     |     |     |   |   |   |   |   |   |     |     |   |   |     |   |   |   |   |   |   |   |   |   |   |   |   |   |   |   |   |   |   |   |   |   |   |   |   |   |   |   |   |   |   |   |   |   |   |   |   |   |     |   |   |   |     |   |   |   |   |   |   |   |   |   |   |   |   |   |   |   |   |   |   |   |   |   |   |   |   |   |
| 1. cox3_E.gracilis   |  | W   | G   | Q   | L   | V   | M   | --- |     |     |     |     |   |   |   |   |   |   |     |     |   |   |     |   |   |   |   |   |   |   |   |   |   |   |   |   |   |   |   |   |   |   |   |   |   |   |   |   |   |   |   |   |   |   |   |   |   |   |   |   |     |   |   |   |     |   |   |   |   |   |   |   |   |   |   |   |   |   |   |   |   |   |   |   |   |   |   |   |   |   |
| 2. cox3_D.papillatum |  | D   | V   | L   | S   | V   | V   | Y   | Y   | A   | --- |     |   |   |   |   |   |   |     |     |   |   |     |   |   |   |   |   |   |   |   |   |   |   |   |   |   |   |   |   |   |   |   |   |   |   |   |   |   |   |   |   |   |   |   |   |   |   |   |   |     |   |   |   |     |   |   |   |   |   |   |   |   |   |   |   |   |   |   |   |   |   |   |   |   |   |   |   |   |   |
| 3. cox3_L.tarentolae |  | D   | V   | L   | S   | V   | M   | Y   | C   | V   | --- |     |   |   |   |   |   |   |     |     |   |   |     |   |   |   |   |   |   |   |   |   |   |   |   |   |   |   |   |   |   |   |   |   |   |   |   |   |   |   |   |   |   |   |   |   |   |   |   |   |     |   |   |   |     |   |   |   |   |   |   |   |   |   |   |   |   |   |   |   |   |   |   |   |   |   |   |   |   |   |
| 4. cox3_T.brucei     |  | I   | N   | G   | N   | I   | M   | Y   | D   | W   | N   | L   | I | N | S | Y | W | K | --- |     |   |   |     |   |   |   |   |   |   |   |   |   |   |   |   |   |   |   |   |   |   |   |   |   |   |   |   |   |   |   |   |   |   |   |   |   |   |   |   |   |     |   |   |   |     |   |   |   |   |   |   |   |   |   |   |   |   |   |   |   |   |   |   |   |   |   |   |   |   |   |
| 5. cox3_N.fowleri    |  | W   | G   | G   | N   | --- |     |     |     |     |     |     |   |   |   |   |   |   |     |     |   |   |     |   |   |   |   |   |   |   |   |   |   |   |   |   |   |   |   |   |   |   |   |   |   |   |   |   |   |   |   |   |   |   |   |   |   |   |   |   |     |   |   |   |     |   |   |   |   |   |   |   |   |   |   |   |   |   |   |   |   |   |   |   |   |   |   |   |   |   |
| 6. cox3_R.americana  |  | W   | G   | G   | N   | --- |     |     |     |     |     |     |   |   |   |   |   |   |     |     |   |   |     |   |   |   |   |   |   |   |   |   |   |   |   |   |   |   |   |   |   |   |   |   |   |   |   |   |   |   |   |   |   |   |   |   |   |   |   |   |     |   |   |   |     |   |   |   |   |   |   |   |   |   |   |   |   |   |   |   |   |   |   |   |   |   |   |   |   |   |
| 7. cox3_J.libera     |  | W   | G   | G   | A   | --- |     |     |     |     |     |     |   |   |   |   |   |   |     |     |   |   |     |   |   |   |   |   |   |   |   |   |   |   |   |   |   |   |   |   |   |   |   |   |   |   |   |   |   |   |   |   |   |   |   |   |   |   |   |   |     |   |   |   |     |   |   |   |   |   |   |   |   |   |   |   |   |   |   |   |   |   |   |   |   |   |   |   |   |   |
